# Supplementary material
Source: PubMed Central journal article supplement (PMC9842213)

## **Supplemental Material**

**Estimated prevalence and trends in smoking among adolescents in South Korea, 2005-2021: a nationwide serial study**

Running title: **Trends in smoking among adolescents in South Korea**

Supplementary Figure 1. Bar and line graph describes trends for ever smokers by sex

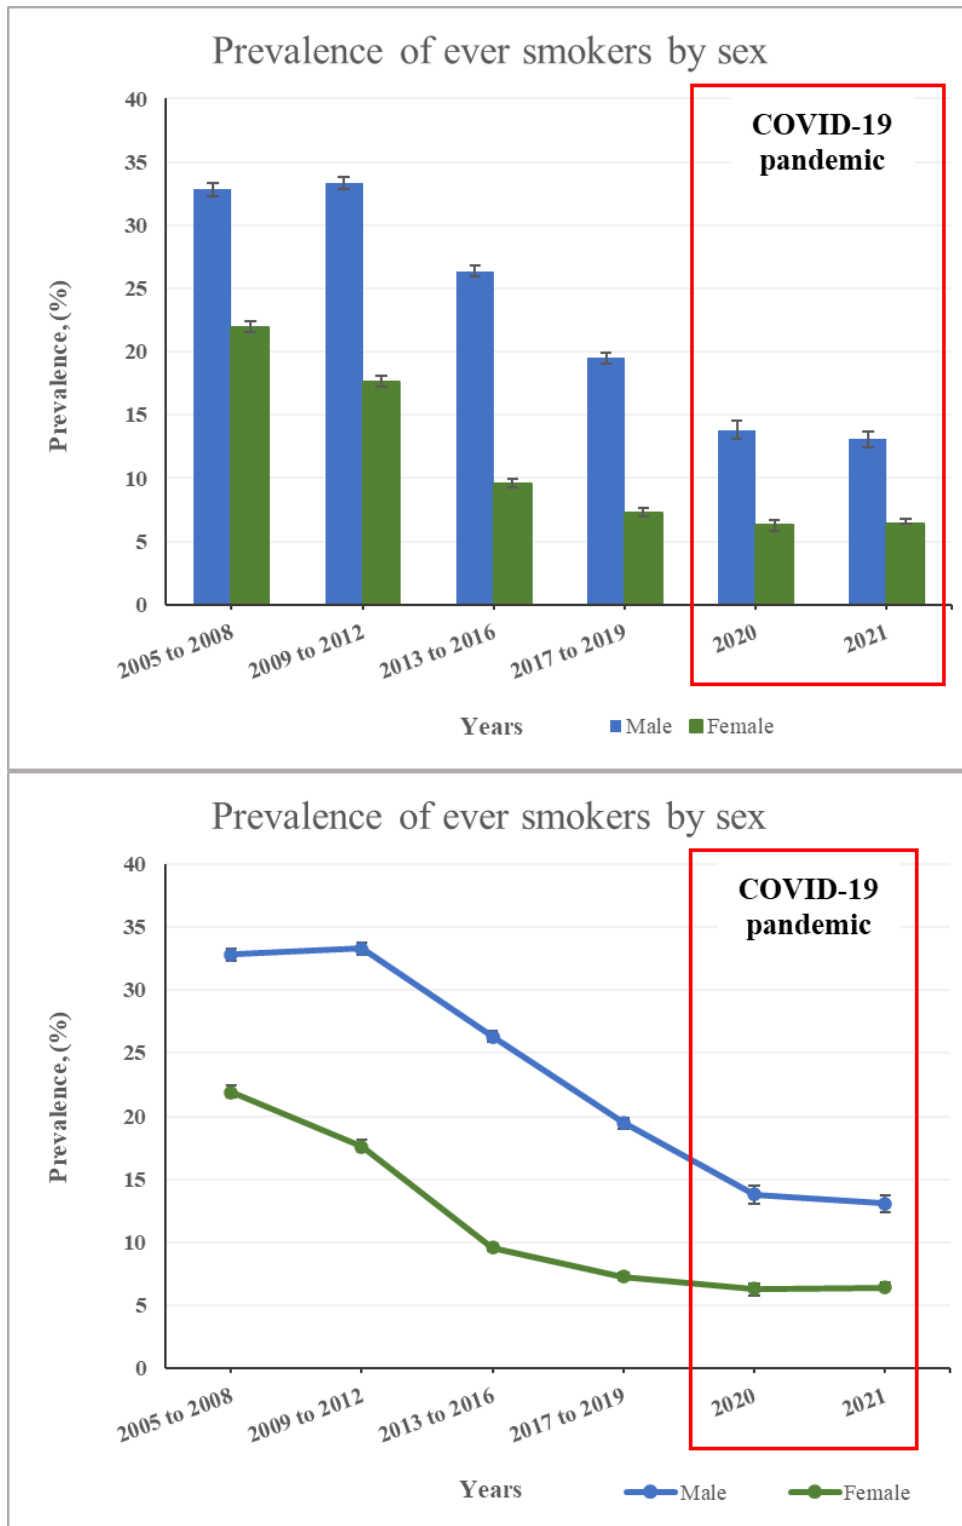

Supplementary Figure 2. Bar and line graph describes trends for daily smokers by sex

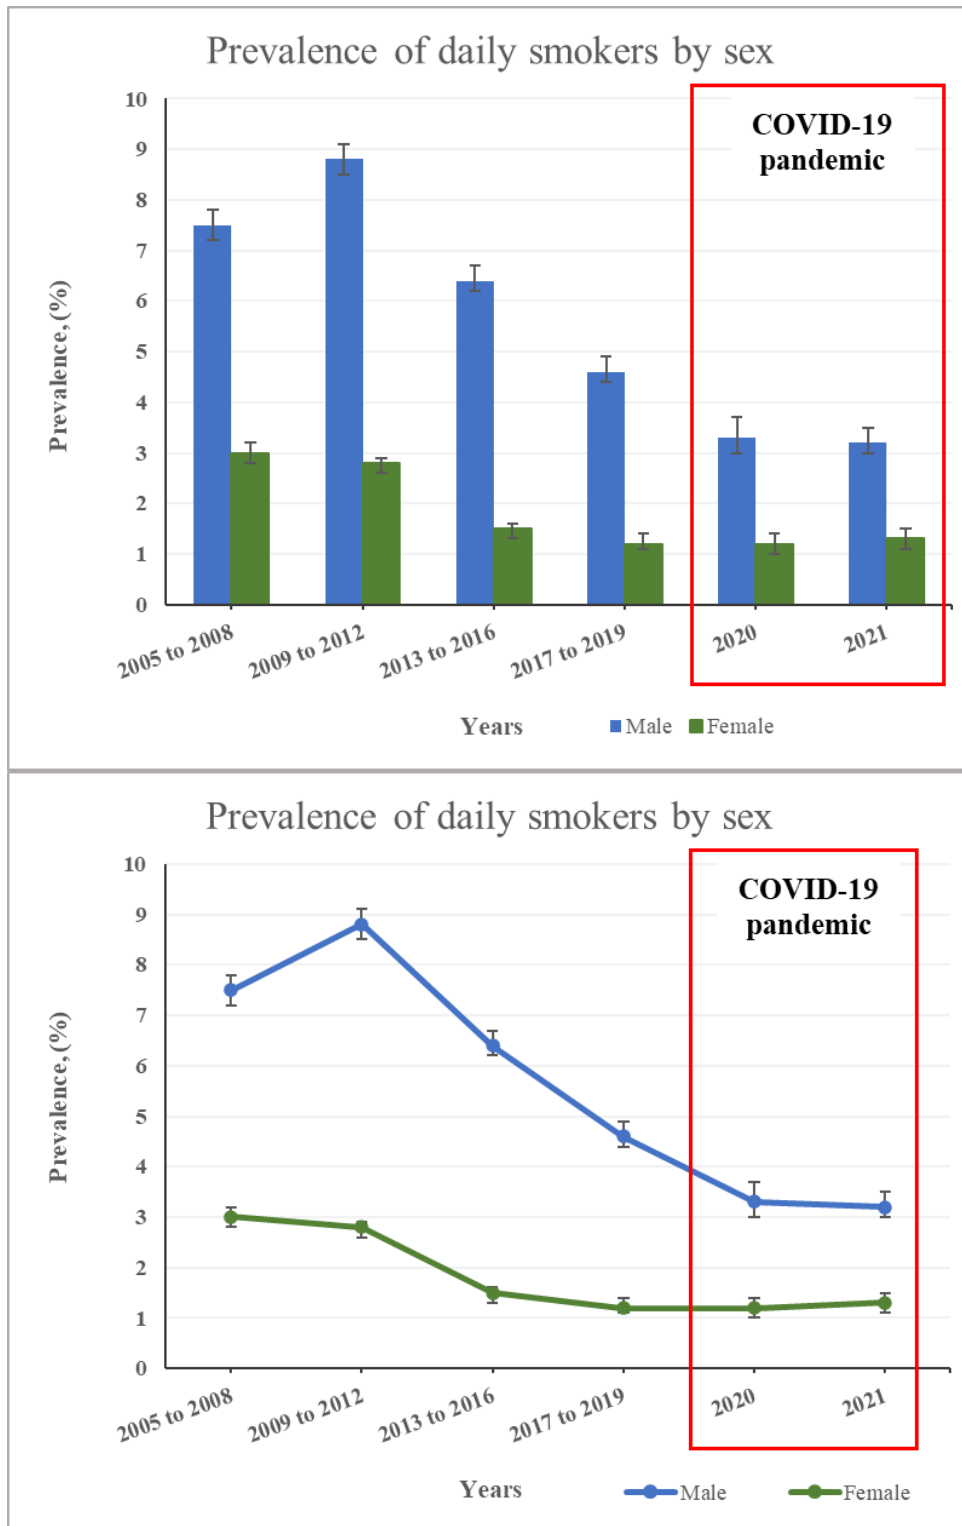

Supplementary Figure 3. Bar and line graph describing trends for ever smokers by grade

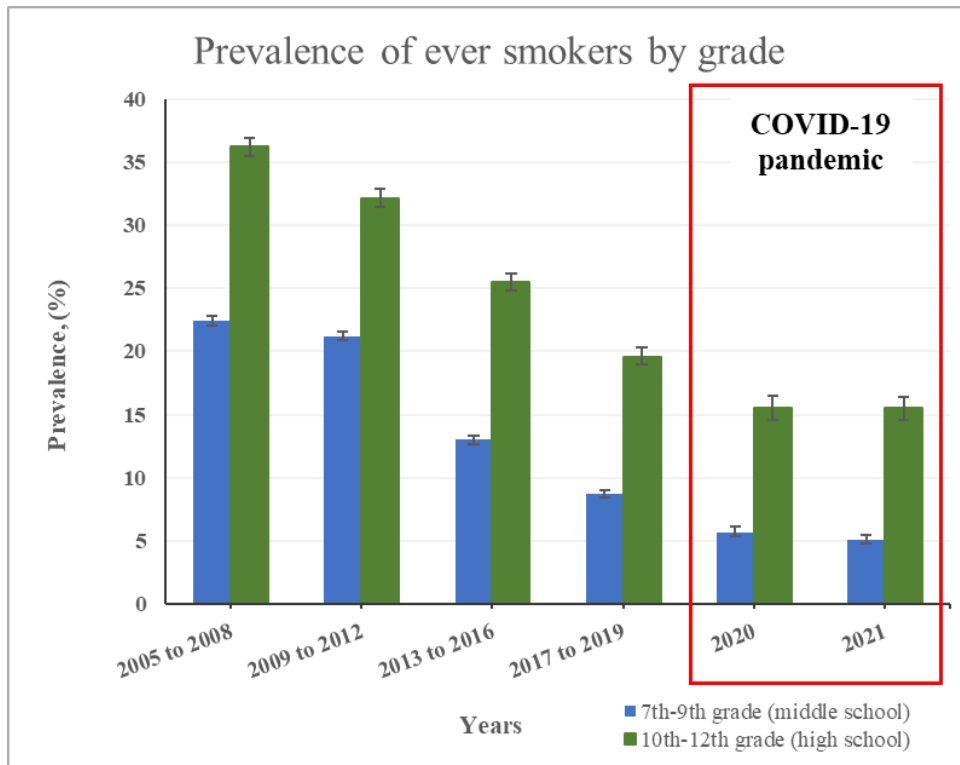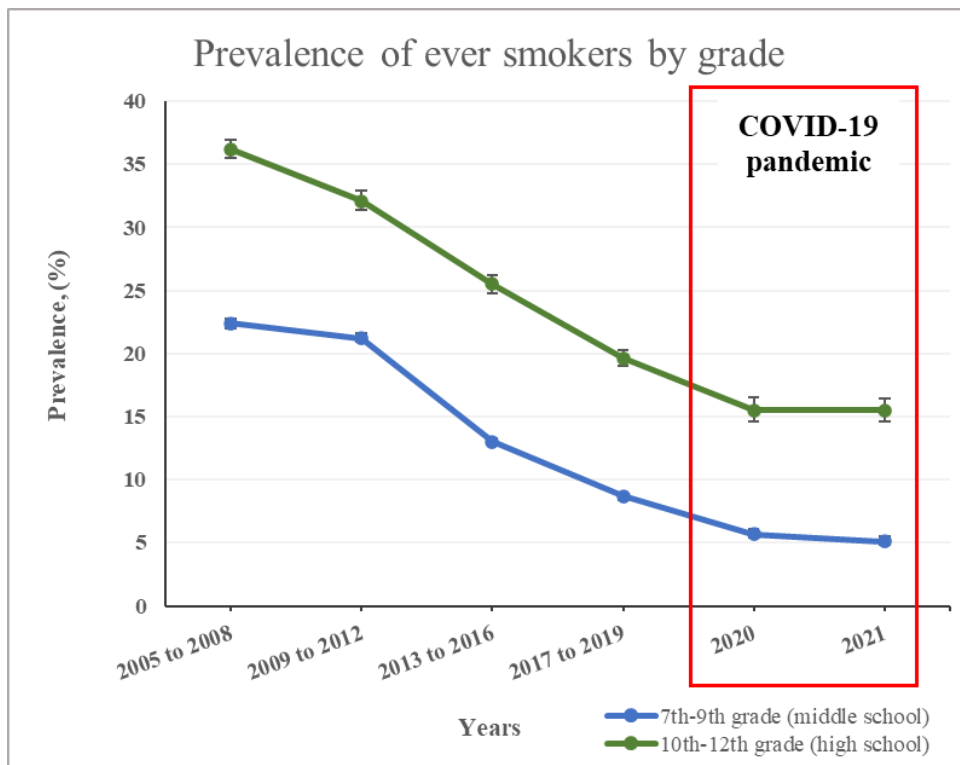

Supplementary Figure 4. Bar and line graph describing trends for daily smokers by grade

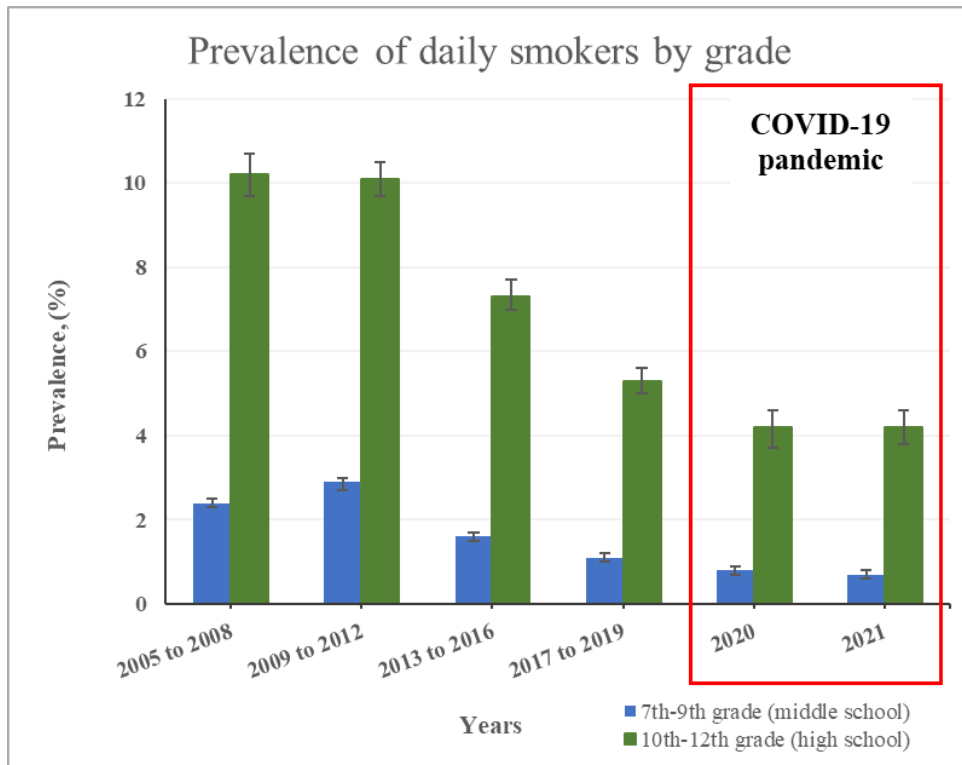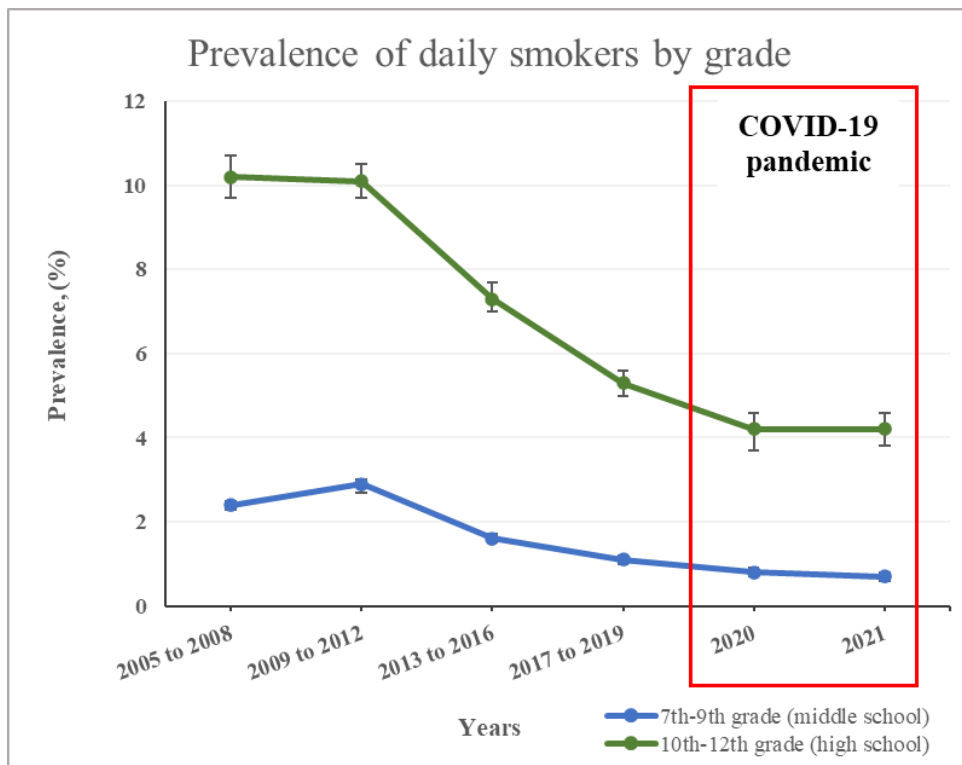

Supplementary Figure 5. Bar and line graph describes trends for ever smokers by region of residence

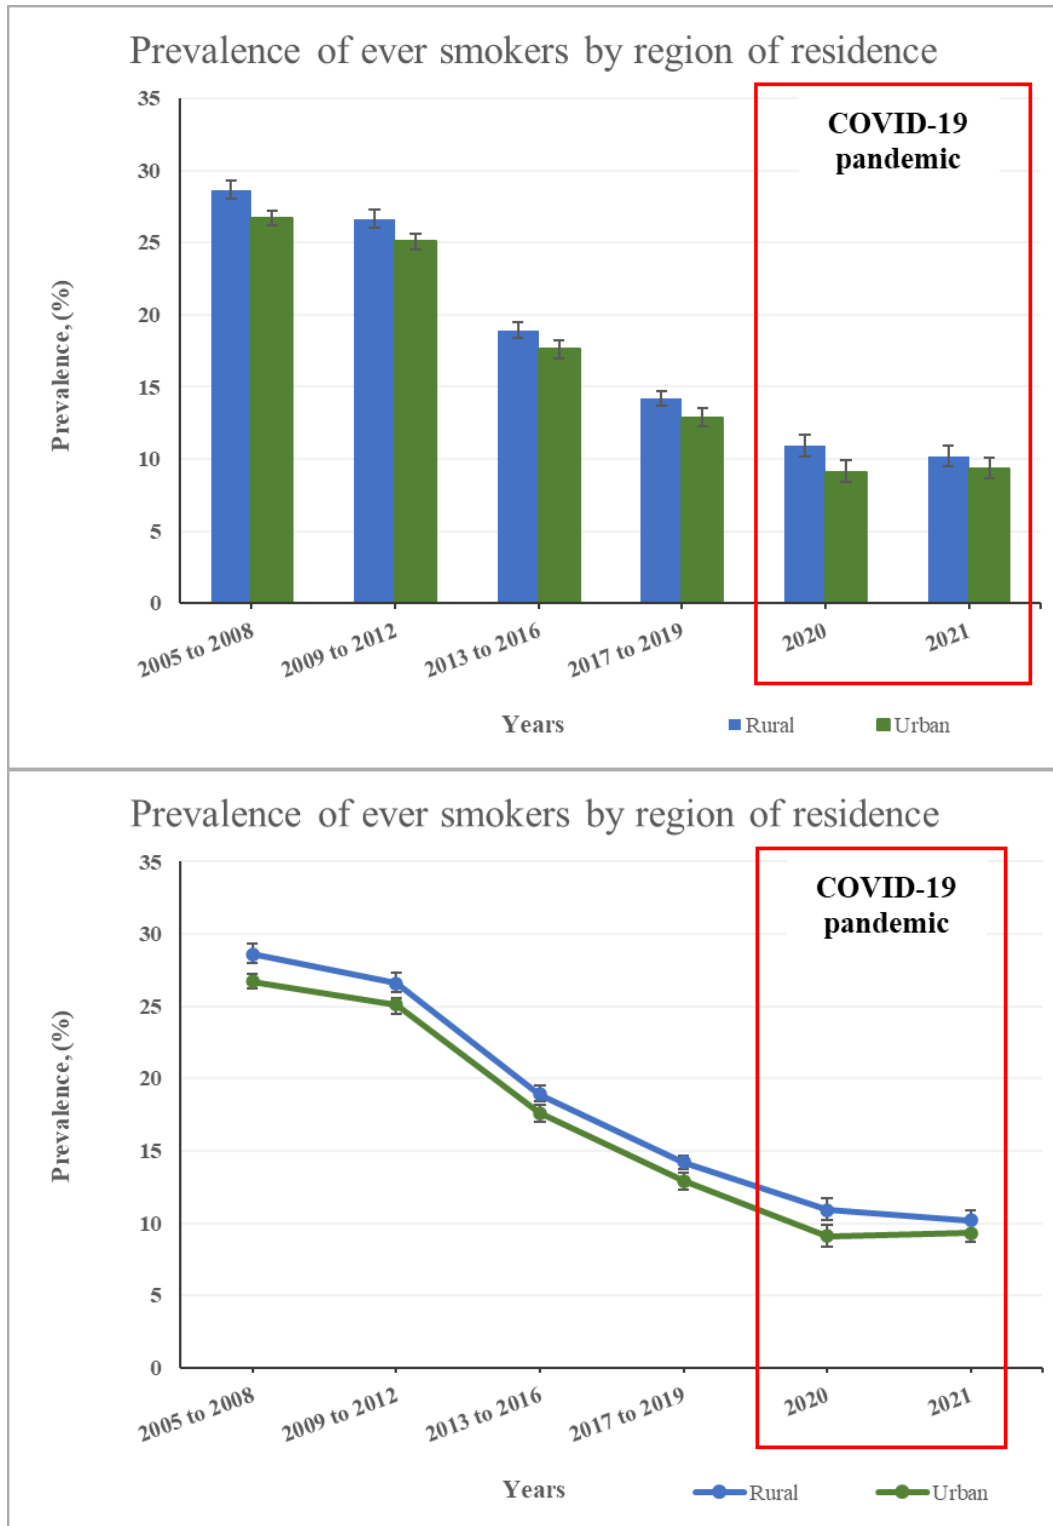

Supplementary Figure 6. Bar and line graph describing trends for daily smokers by region of residence

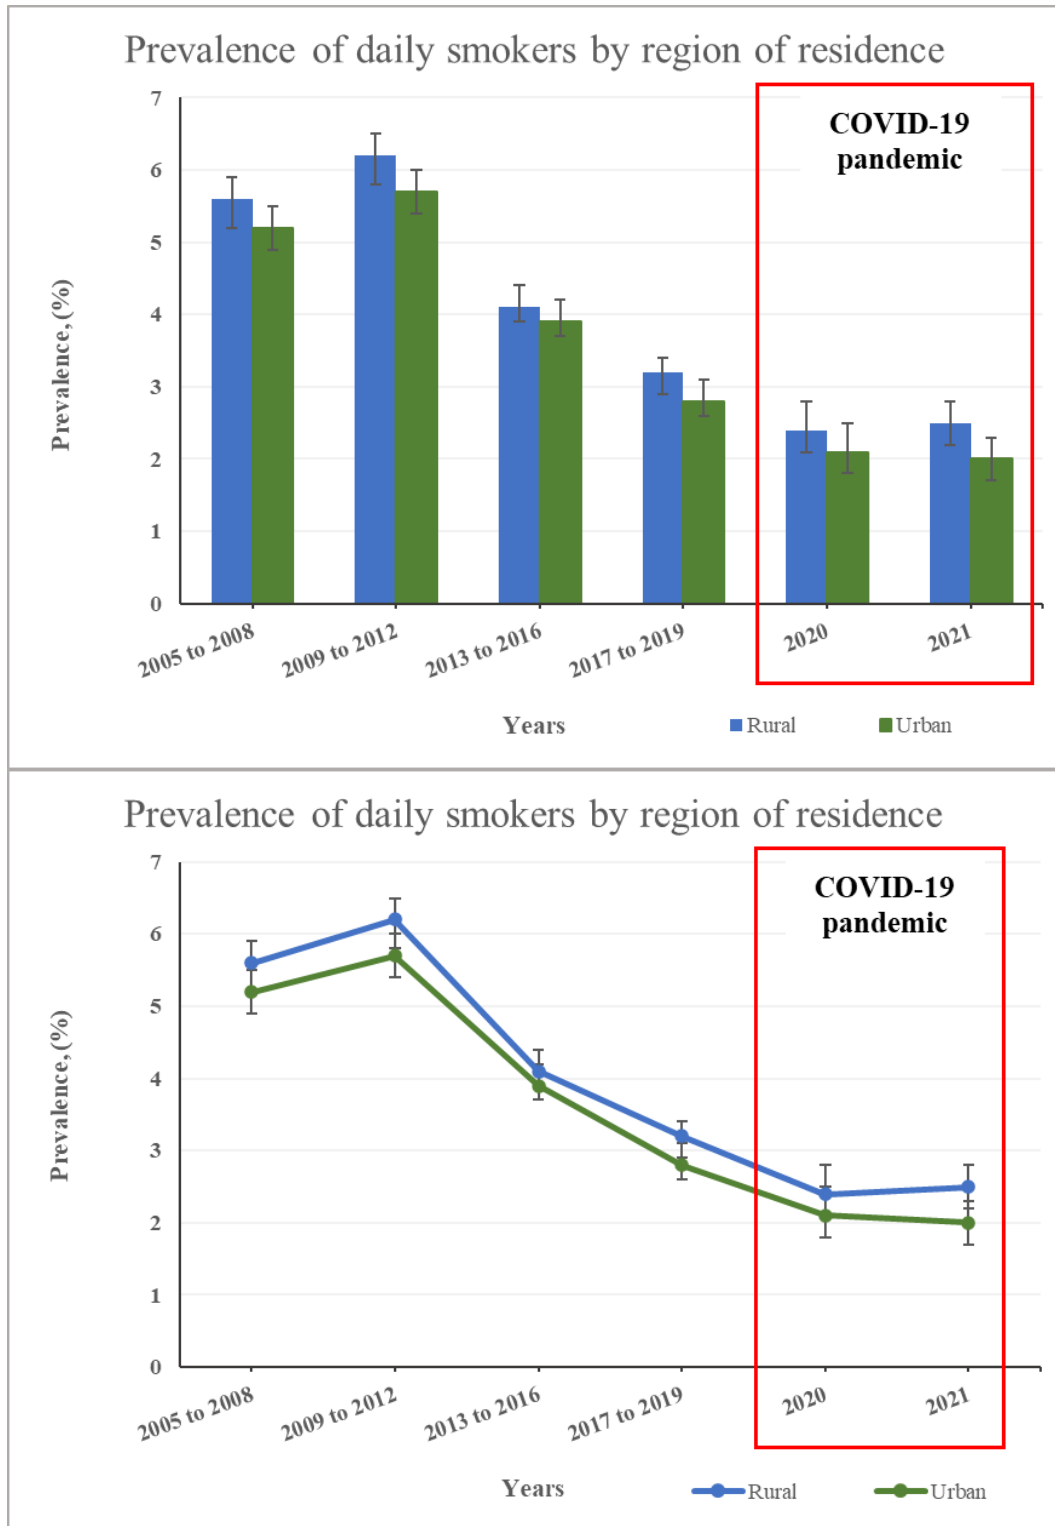

Supplementary Figure 7. Bar and line graph describes trends for ever smokers by sadness or despair

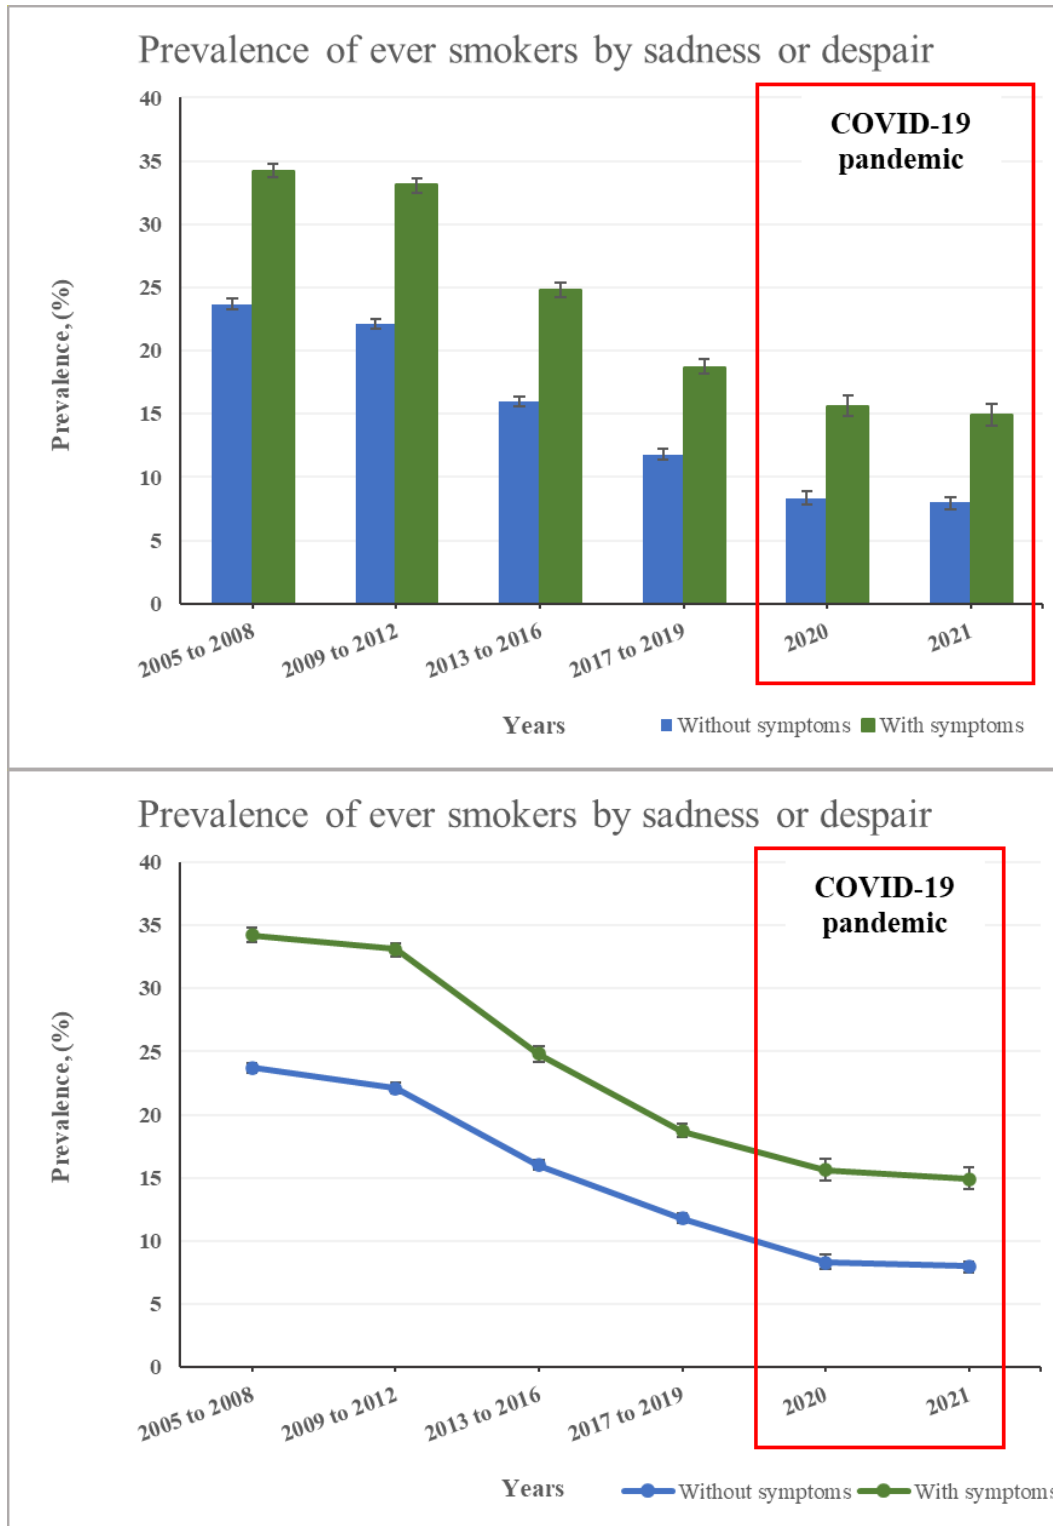



Supplementary Figure 8. Bar and line graph describing trends for daily smokers by sadness or despair

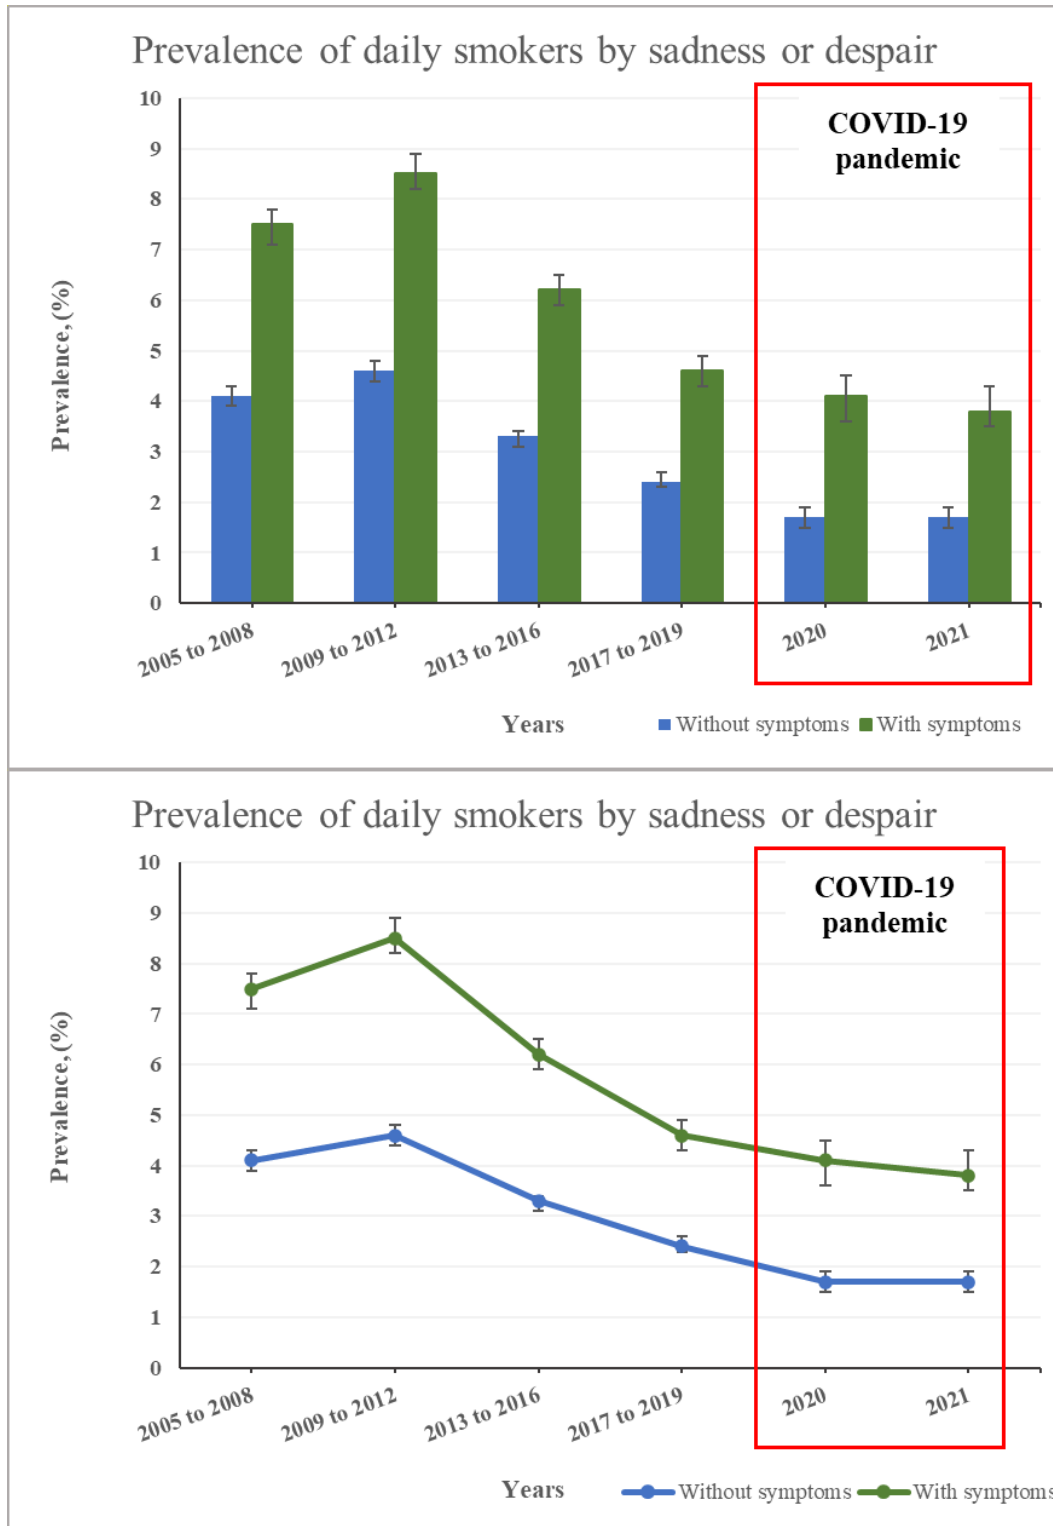

Supplementary Figure 9. Bar and line graph describes trends for ever smokers by substance use

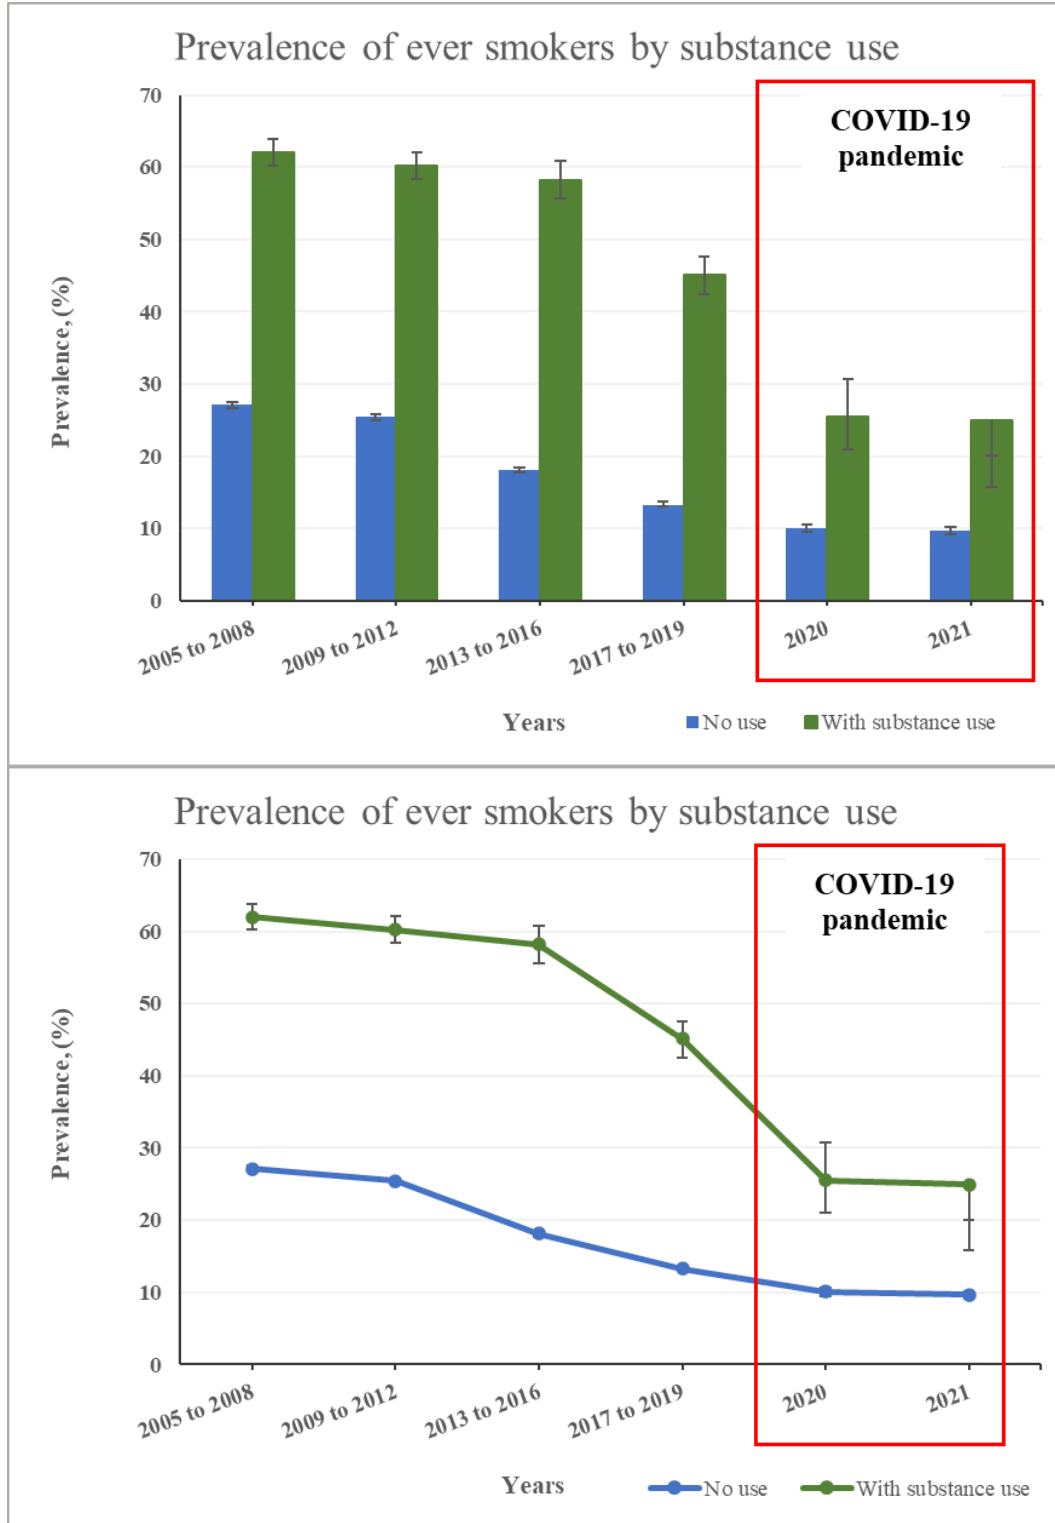

Supplementary Figure 10. Bar and line graph describes trends for daily smokers by substance use

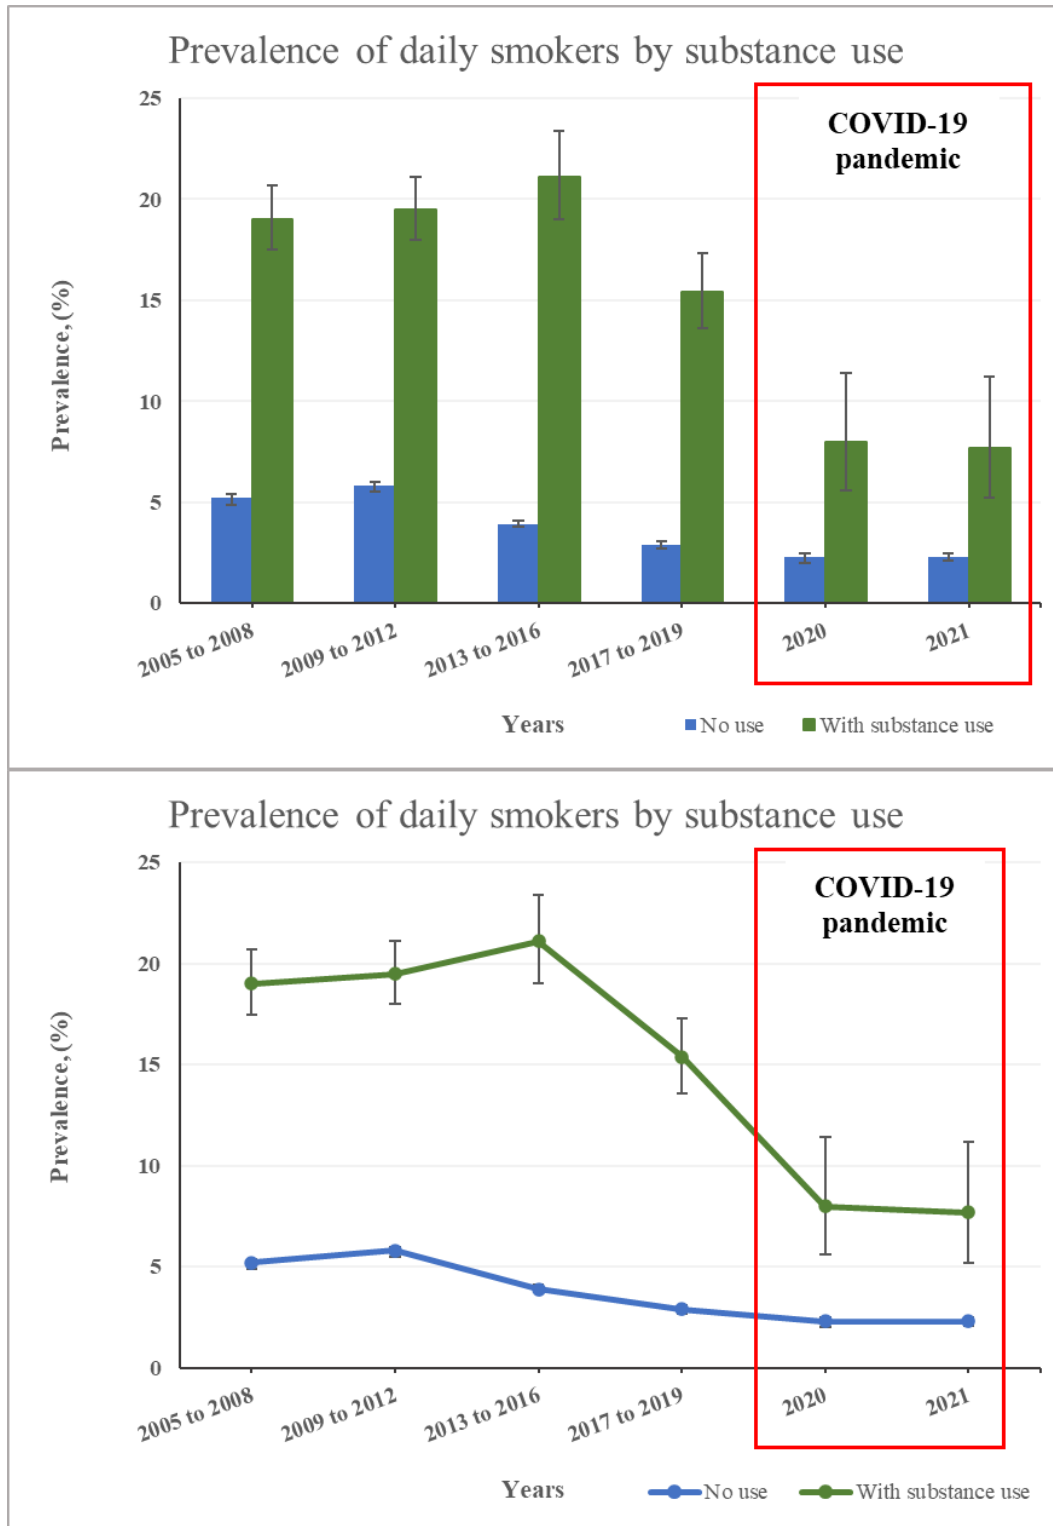

Supplementary Figure 11. Bar and line graph describing trends for ever smokers by parents' educational level

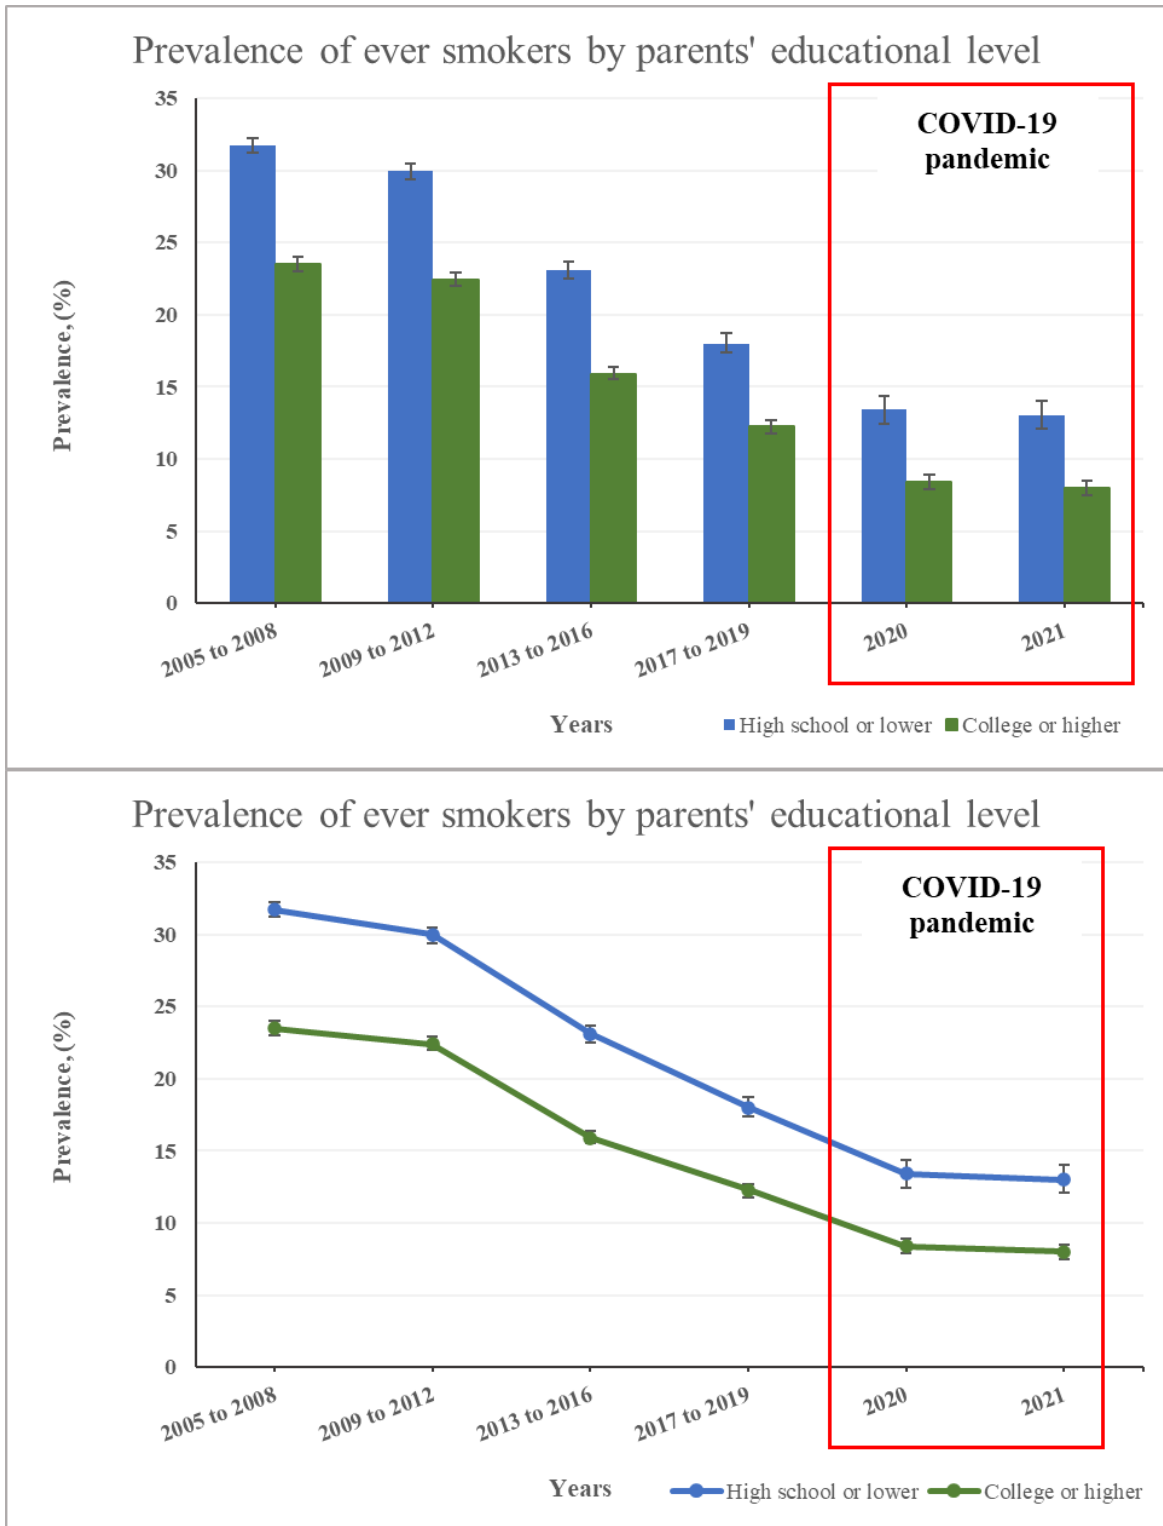

Supplementary Figure 12. Bar and line graph describing trends for daily smokers by parents' educational level

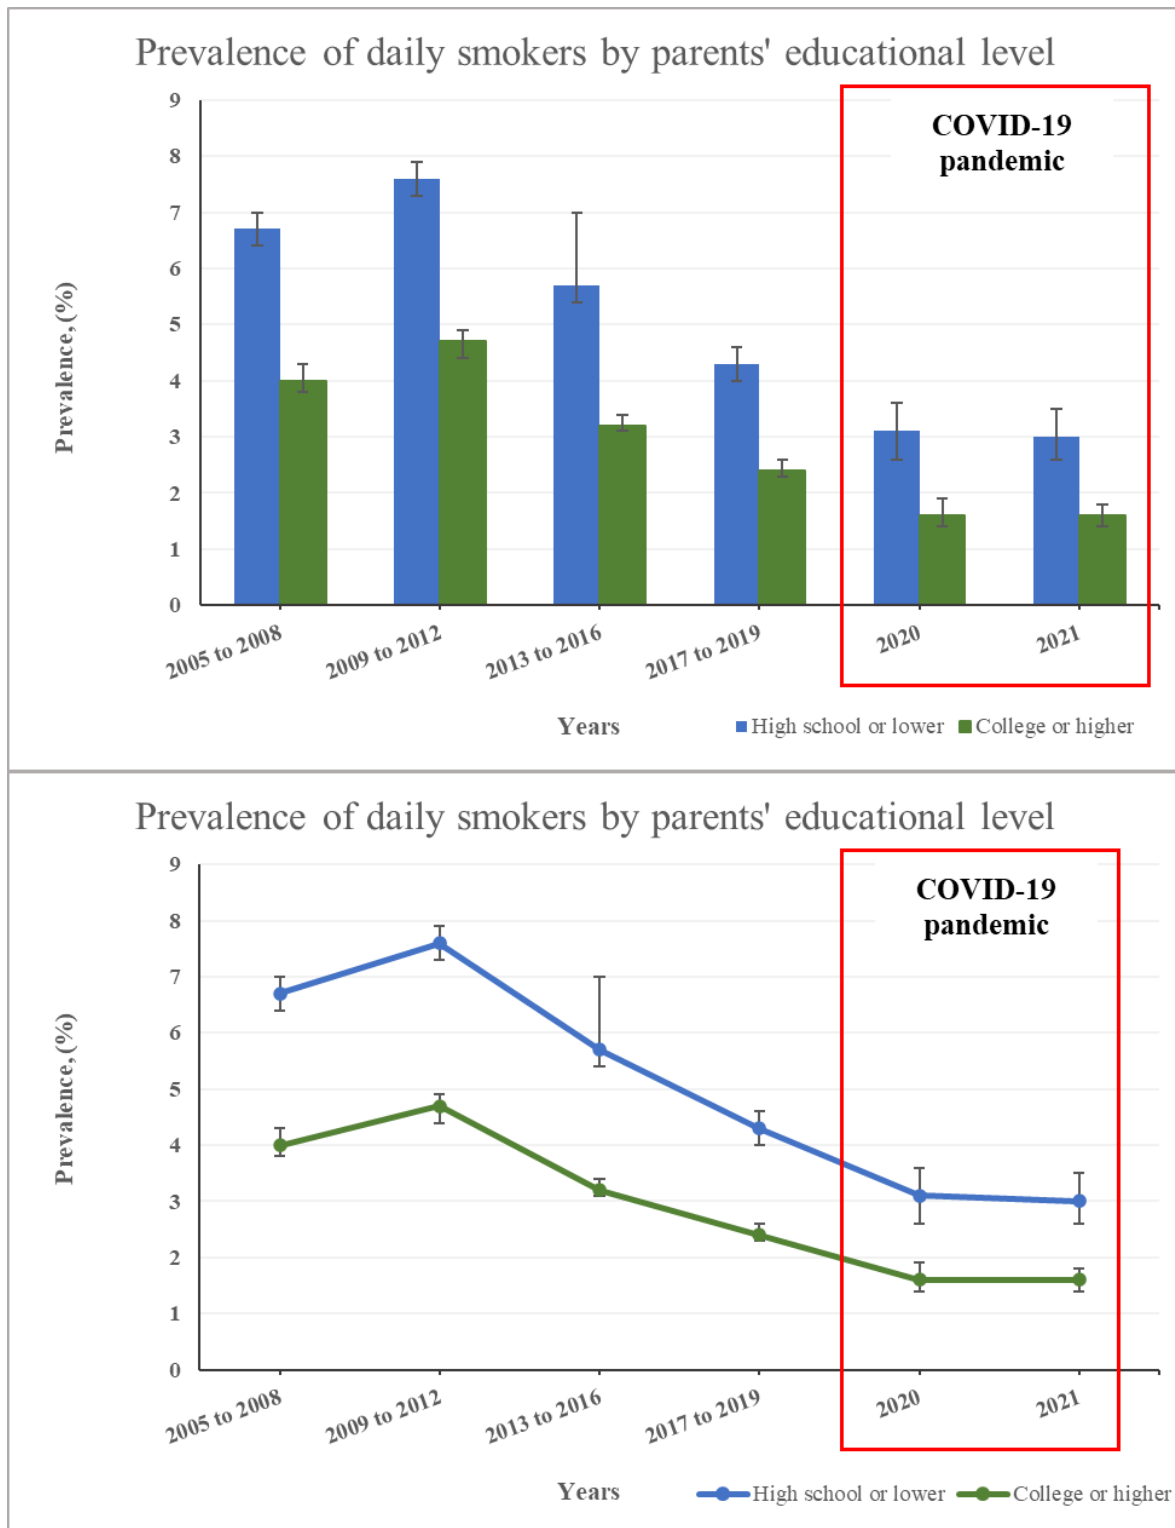

Supplementary Figure 13. Bar and line graph describes trends for ever smokers by economic level

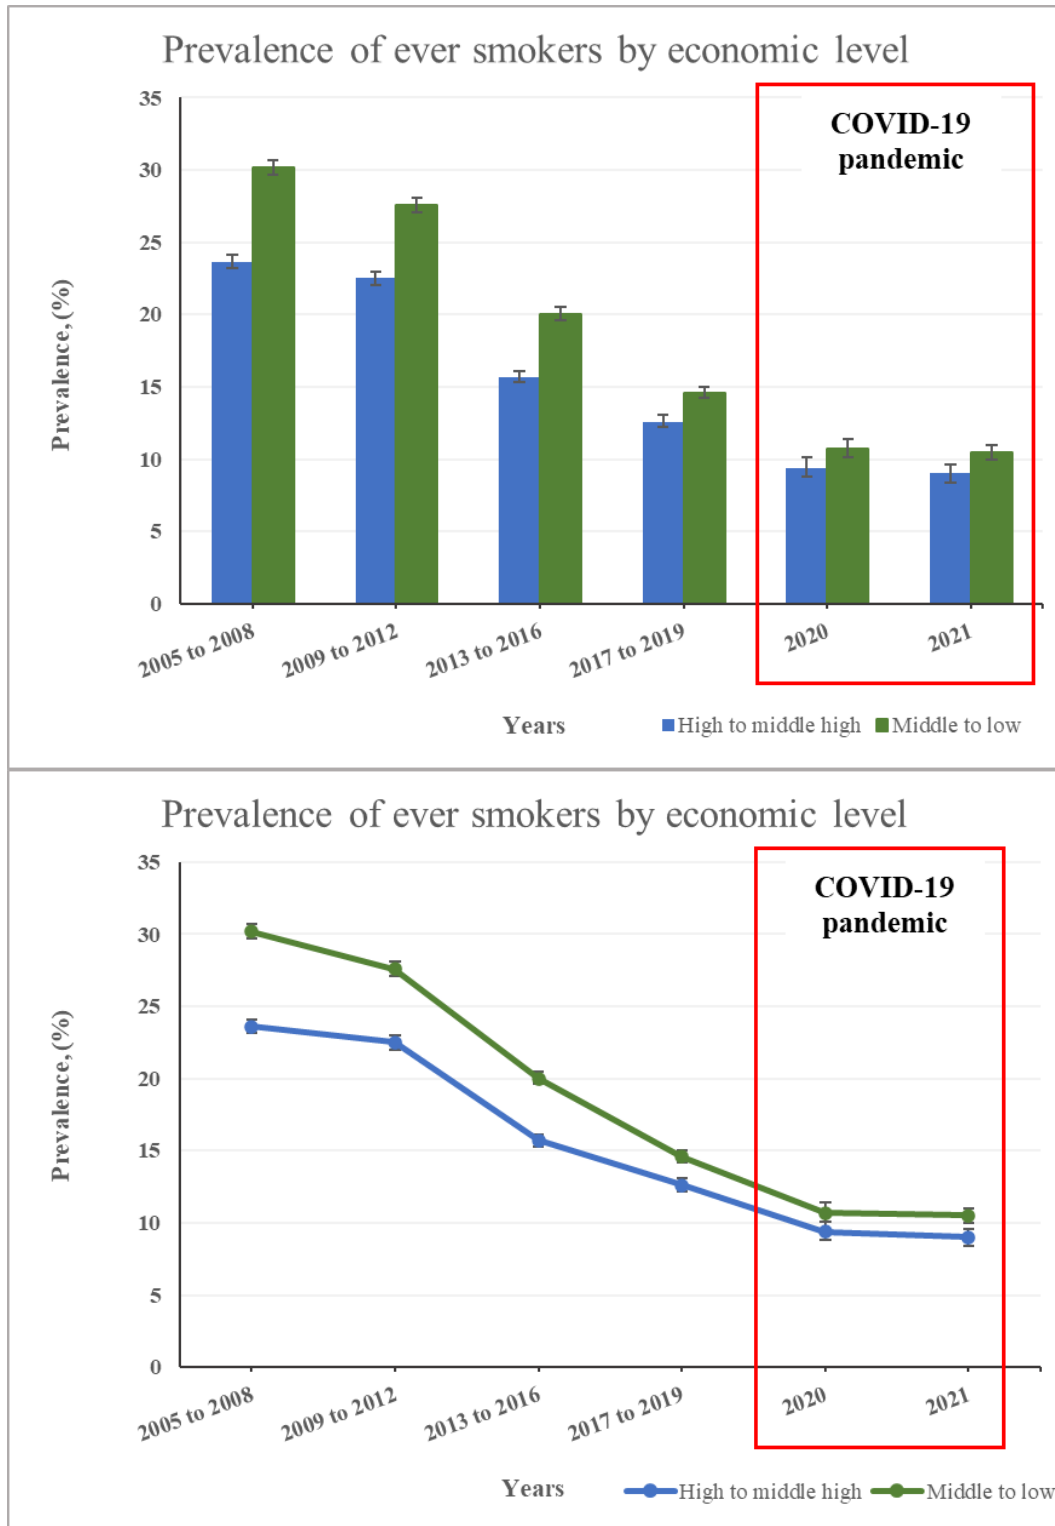

Supplementary Figure 14. Bar and line graph describing trends for daily smokers by economic level

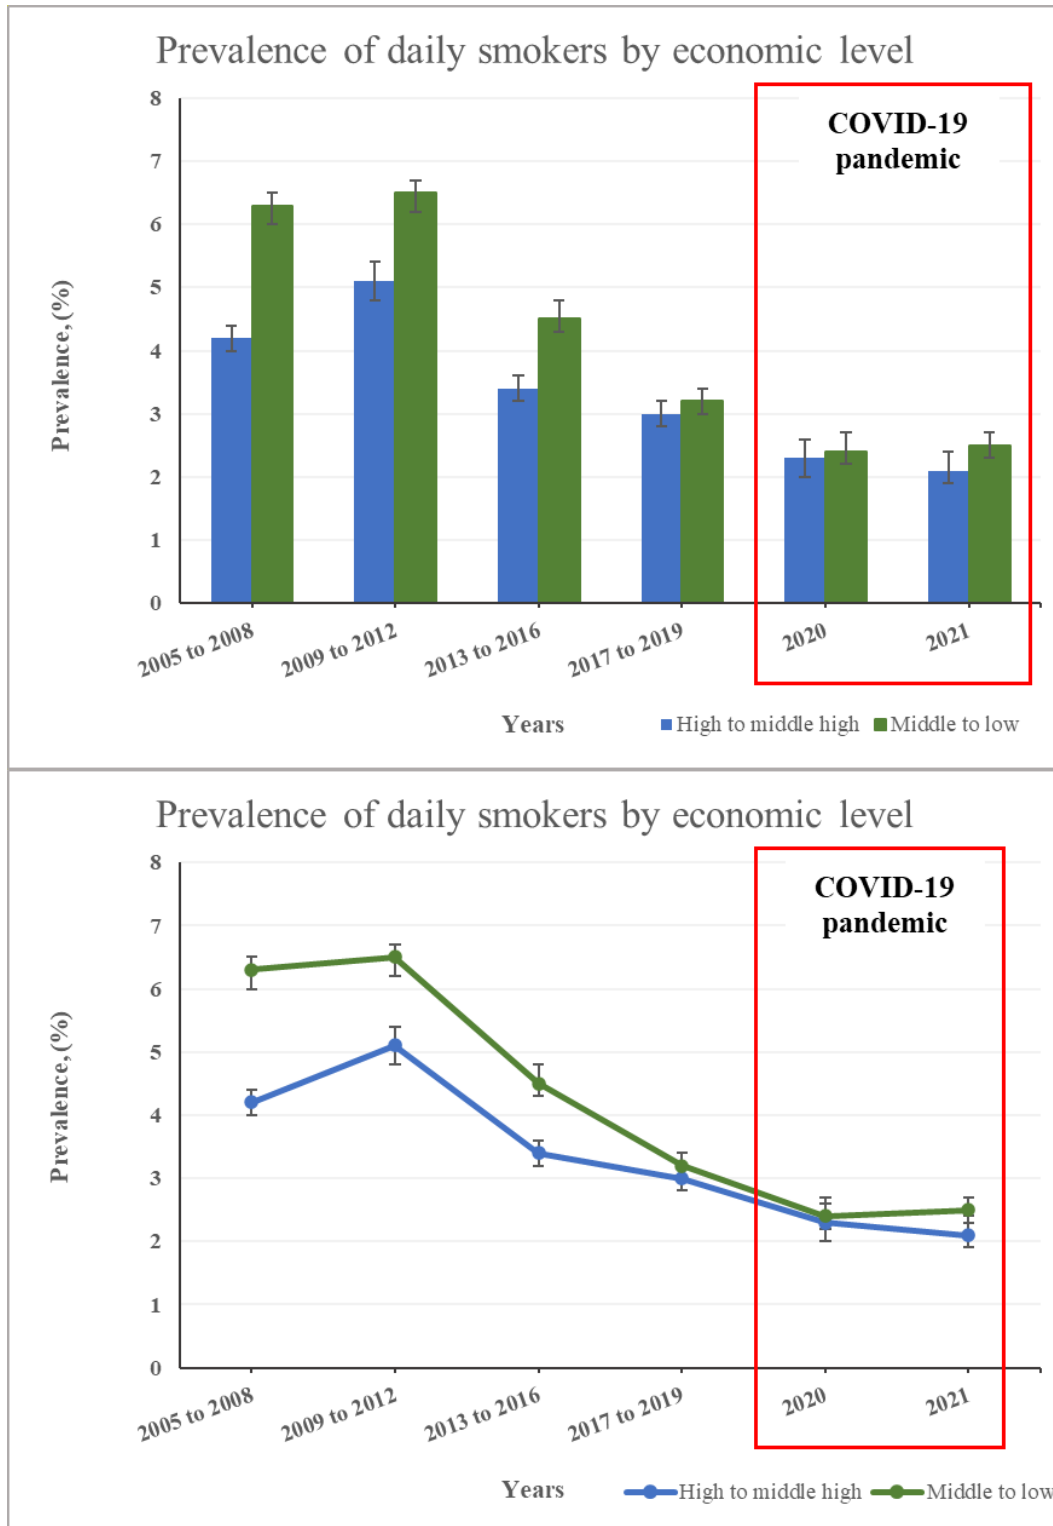





Supplementary Figure 15. Graphical abstract

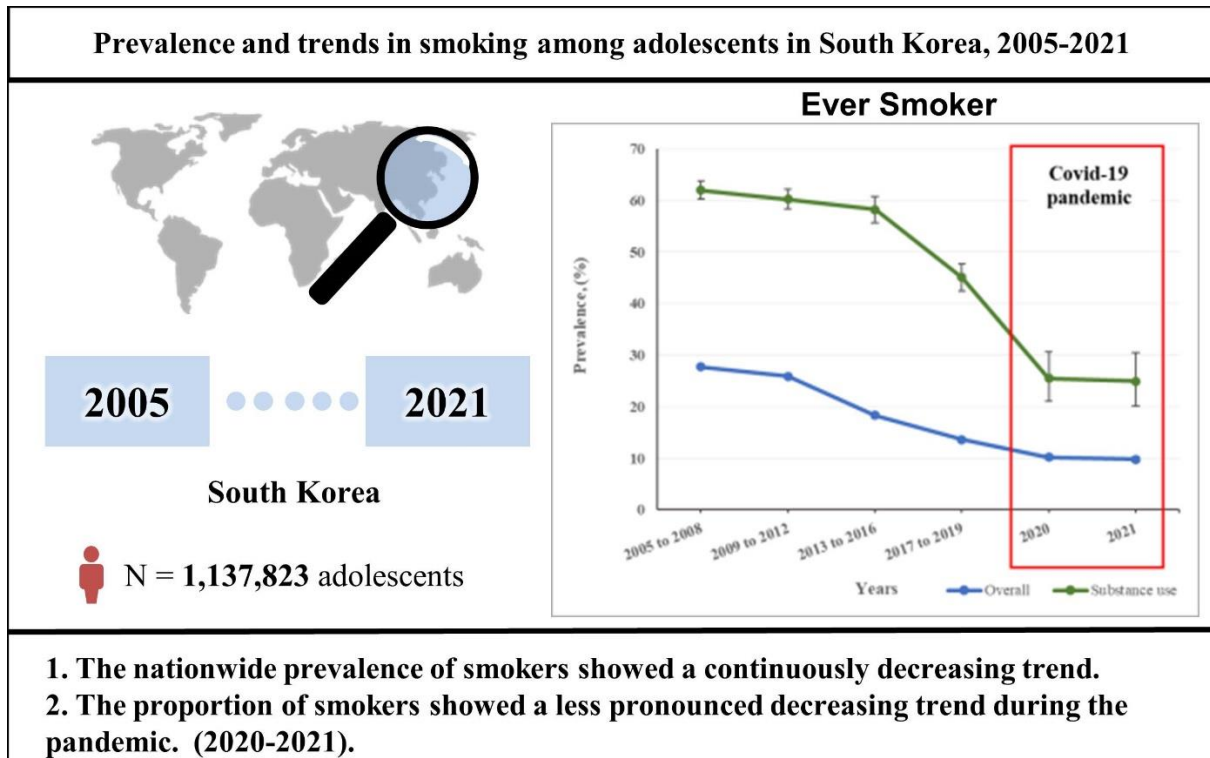

Supplement: 12519_2022_673_MOESM1_ESM.pdf [file 12519_2022_673_MOESM1_ESM.pdf]
